# Supplementary material for: Synthesis and structure–activity relationship of novel thiazole aminoguanidines against MRSA and Escherichia coli
Source: Royal Society of Chemistry journal article supplement (doi:10.1039/d4md00017j), 2024-01-01
Supplement: d4md00017j1.pdf [file d4md00017j1.pdf]

Supporting Information

**Synthesis and structure-activity relationship of novel thiazole aminoguanidines  
against MRSA and *Escherichia coli***

Ping Yang, Hui-Zhong Liu, Ying-Si Wang, Hong Qi, Ling-Ling Wang, Bei-Bei Wang,  
Xiao-Bao Xie

Figures S1 to S15 are <sup>1</sup>H NMR spectra, Figures S16 to S24 are <sup>13</sup>C NMR spectra, Figure S25 is computational conformation, Figures S26 to S30 are representative HPLC traces, Table S1 is docking scores, Table S2 is in silico ADMET profiling for compound 4a-o.

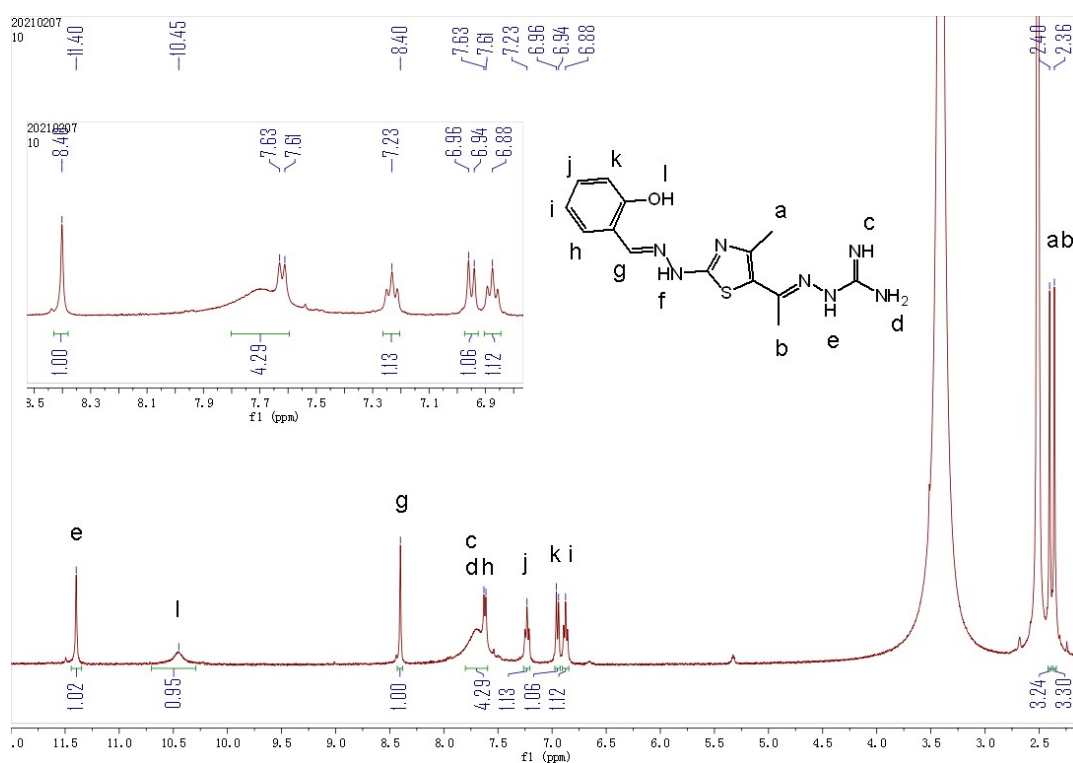

Figure S1. <sup>1</sup>H NMR spectra of compound 4a.

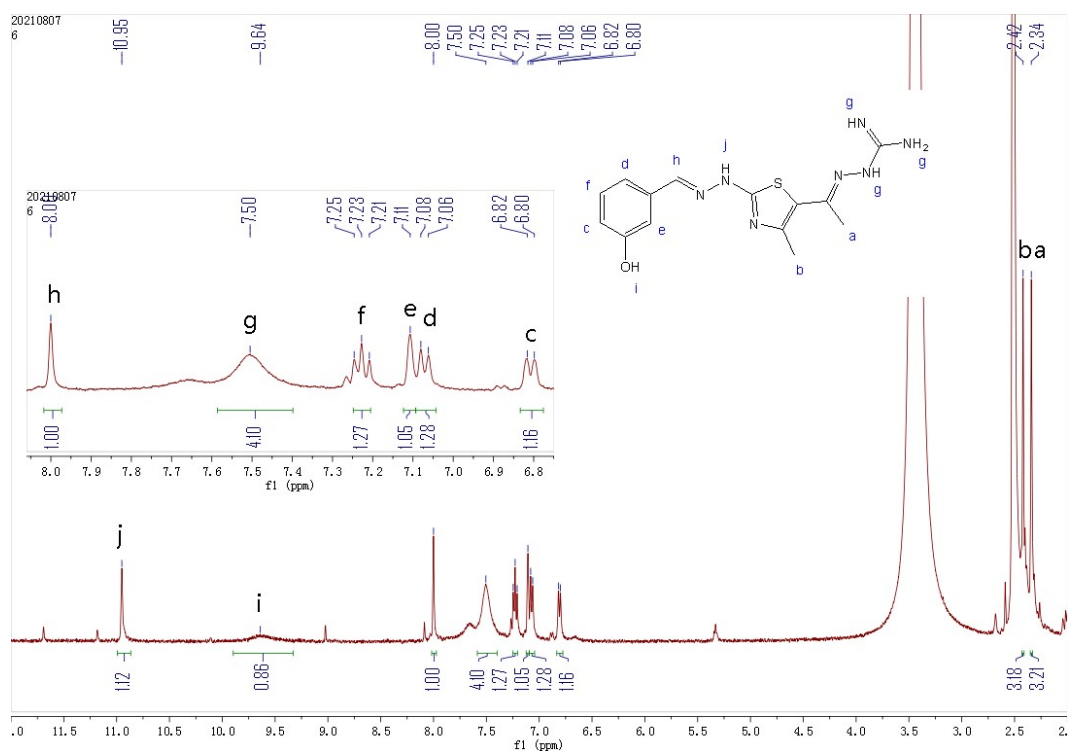

Figure S2.  $^1\text{H}$  NMR spectra of compound **4b**.

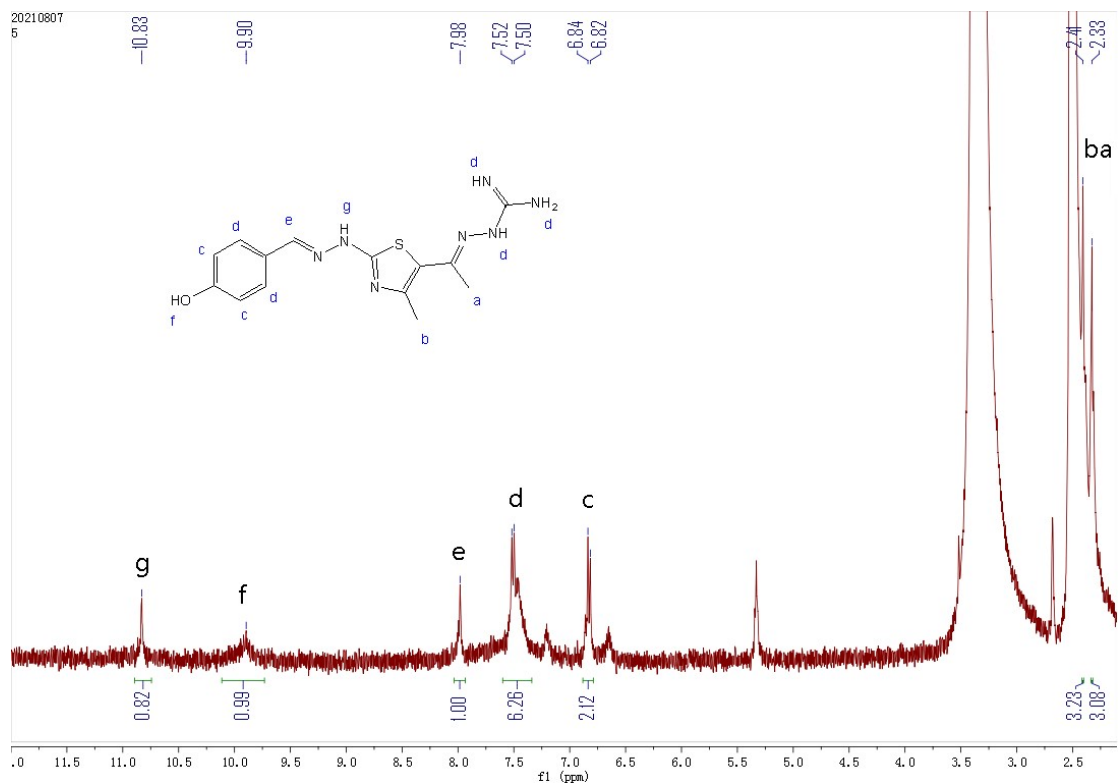

Figure S3.  $^1\text{H}$  NMR spectra of compound **4c**.

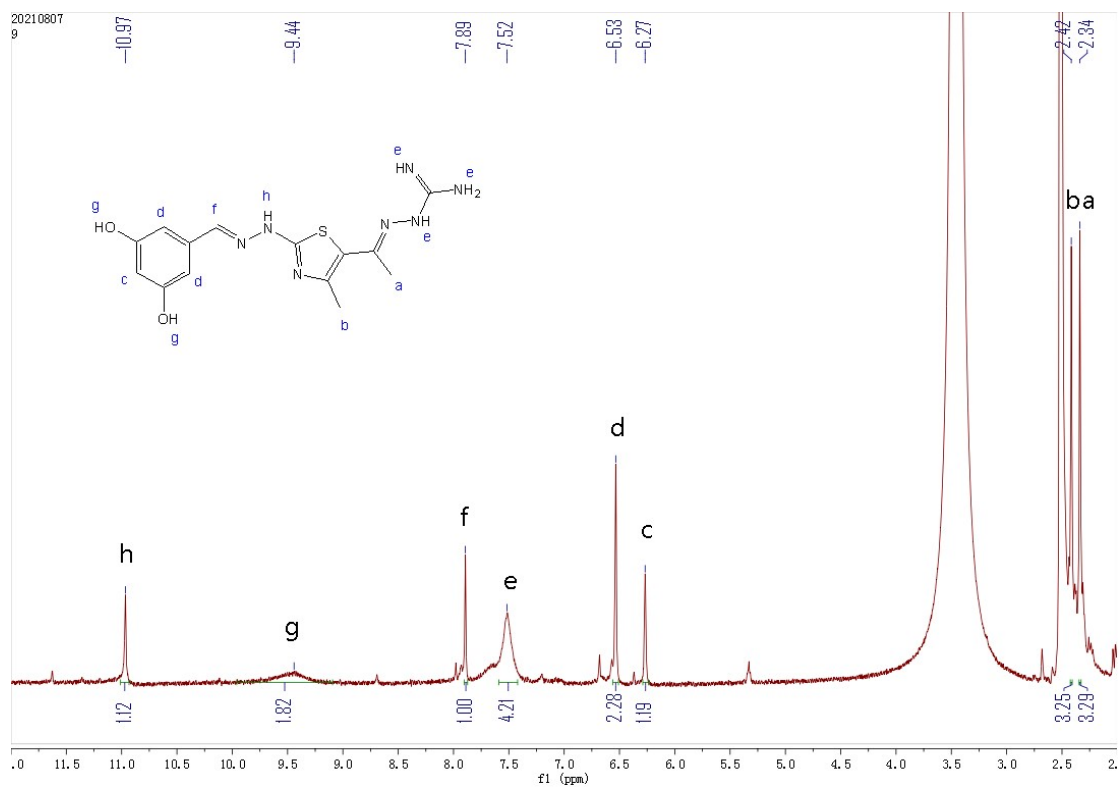

Figure S4.  $^1\text{H}$  NMR spectra of compound **4d**.

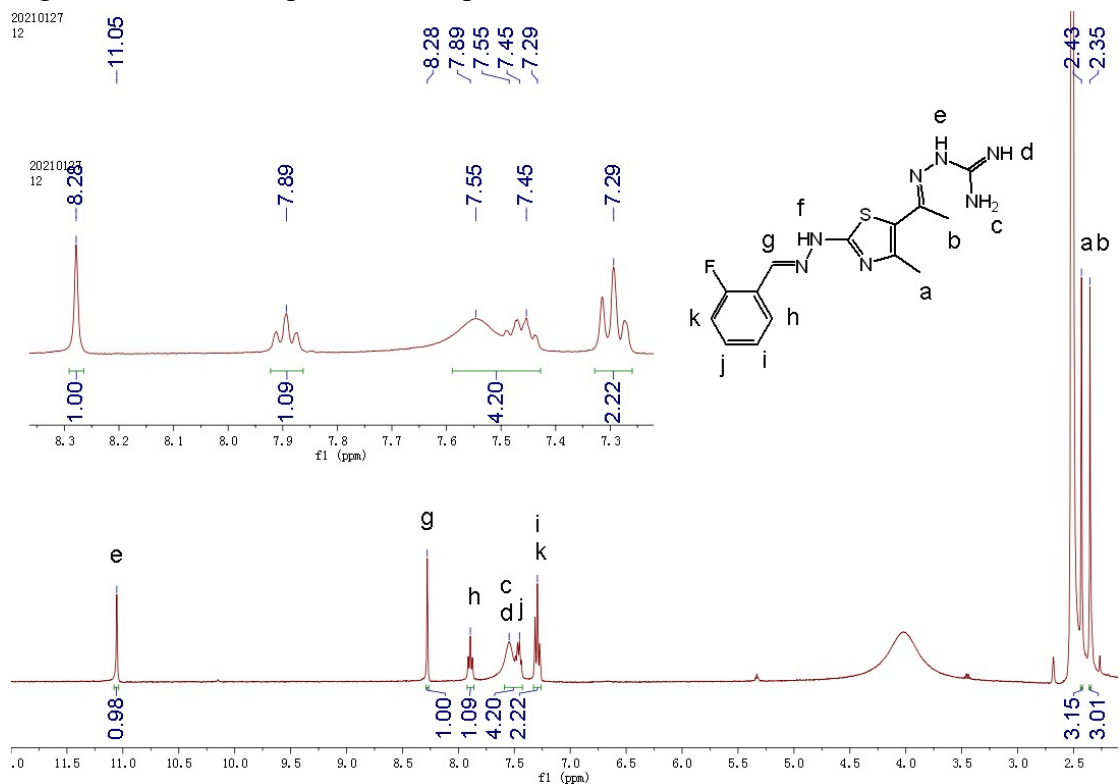

Figure S5.  $^1\text{H}$  NMR spectra of compound **4e**.

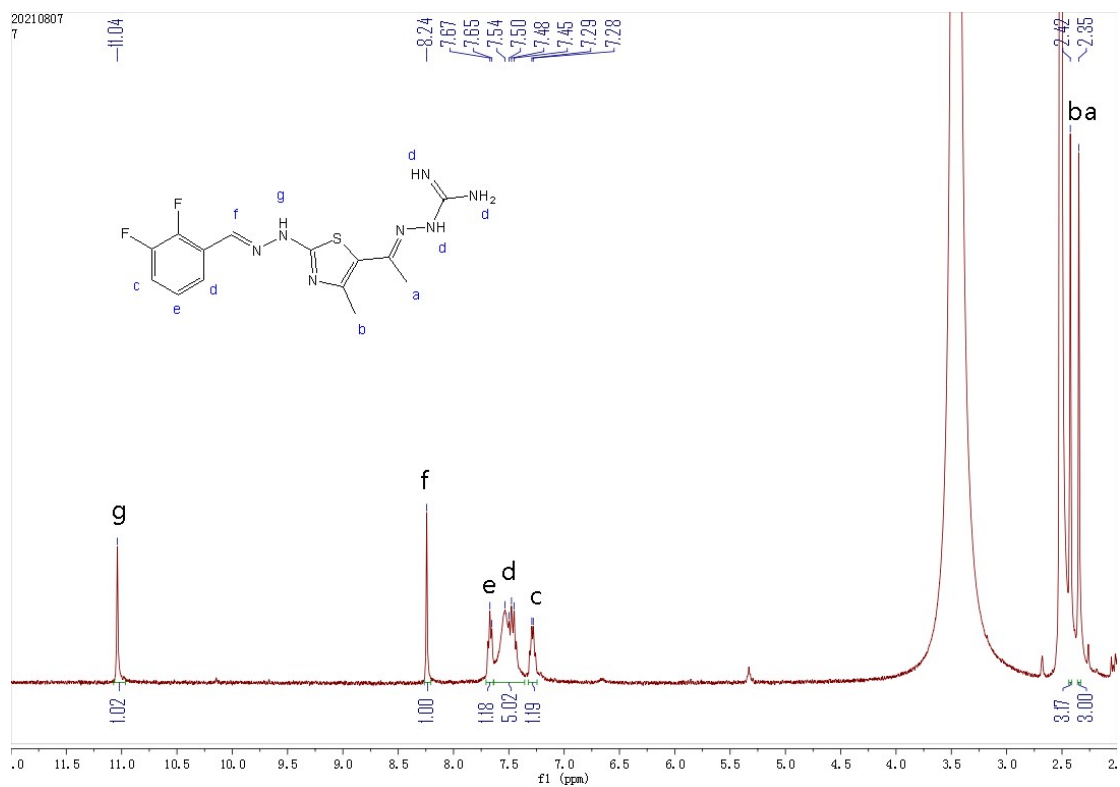

Figure S6. <sup>1</sup>H NMR spectra of compound **4f**.

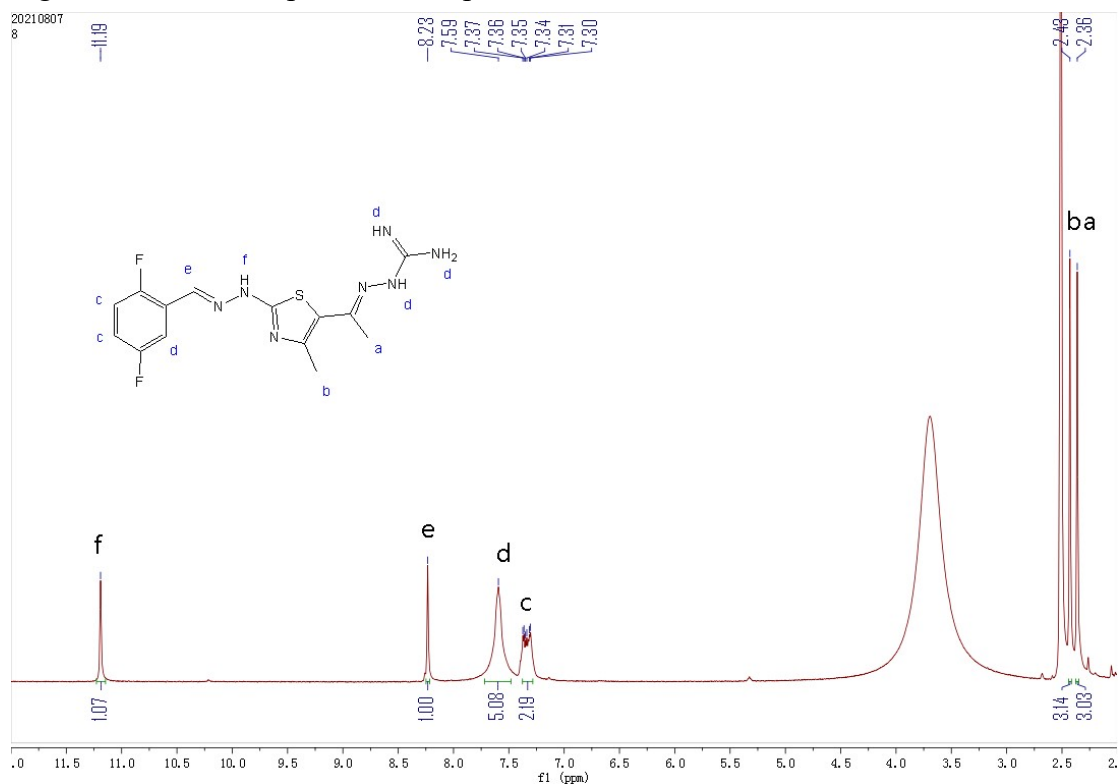

Figure S7. <sup>1</sup>H NMR spectra of compound **4g**.

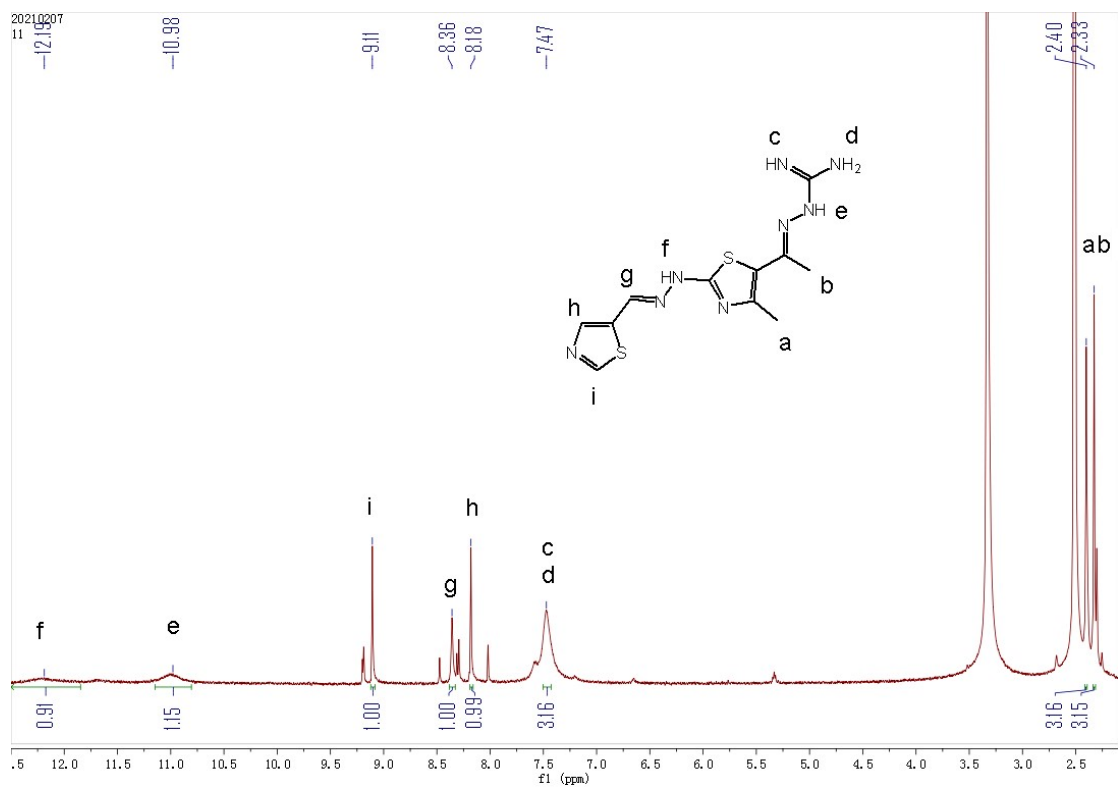

Figure S8.  $^1\text{H}$  NMR spectra of compound **4h**.

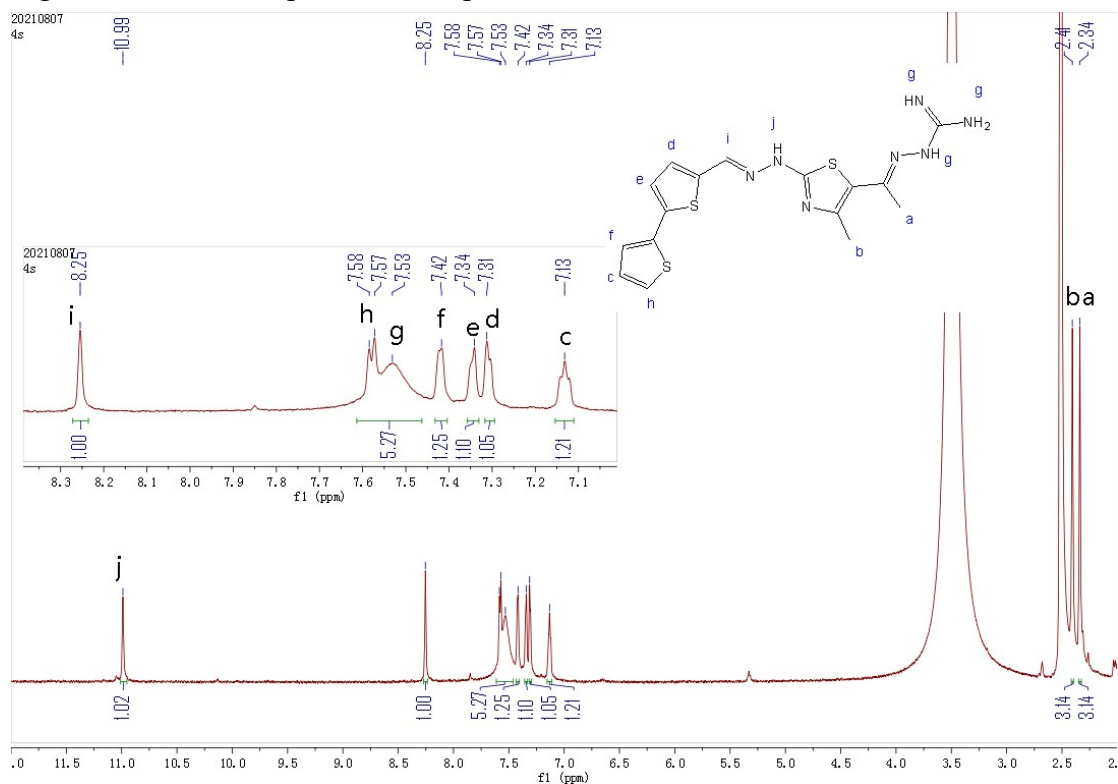

Figure S9.  $^1\text{H}$  NMR spectra of compound **4i**.

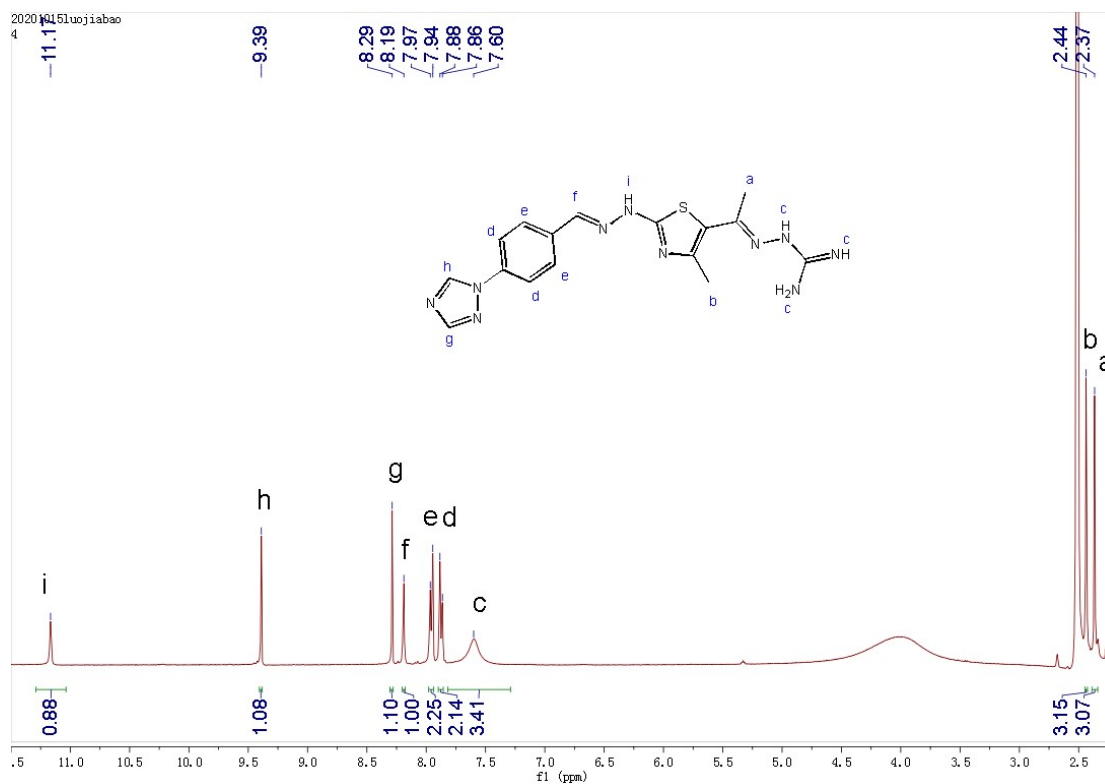

Figure S10.  $^1\text{H}$  NMR spectra of compound **4j**.

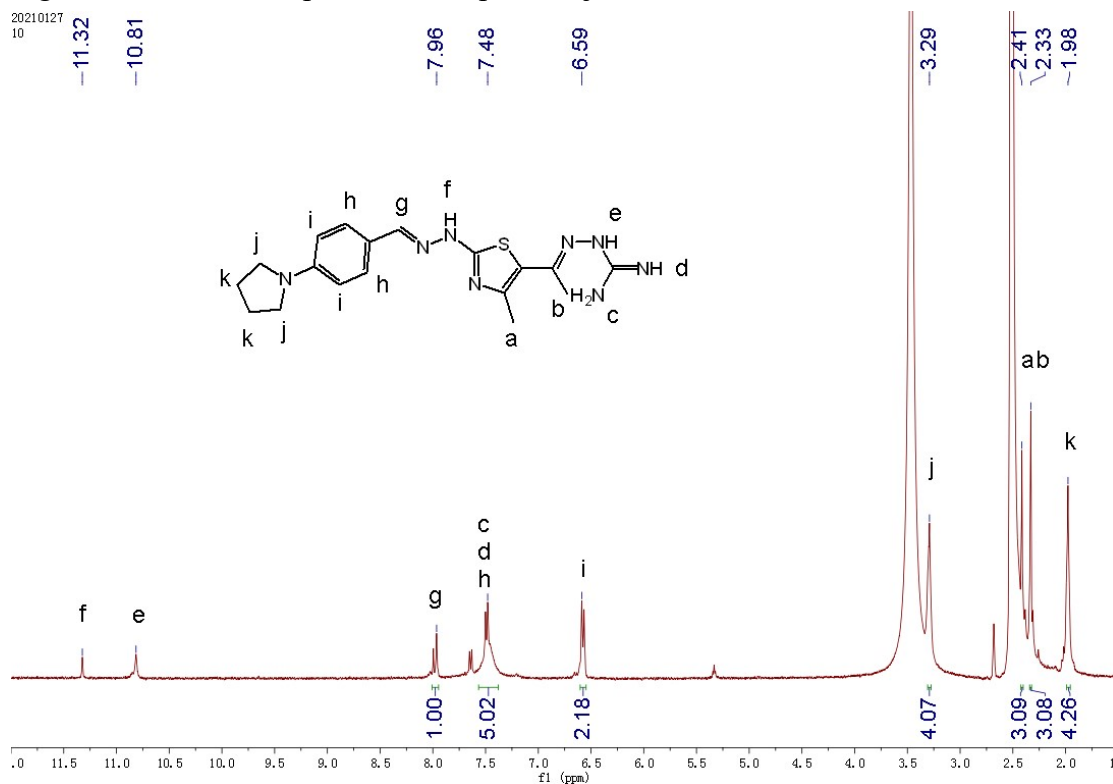

Figure S11.  $^1\text{H}$  NMR spectra of compound **4k**.

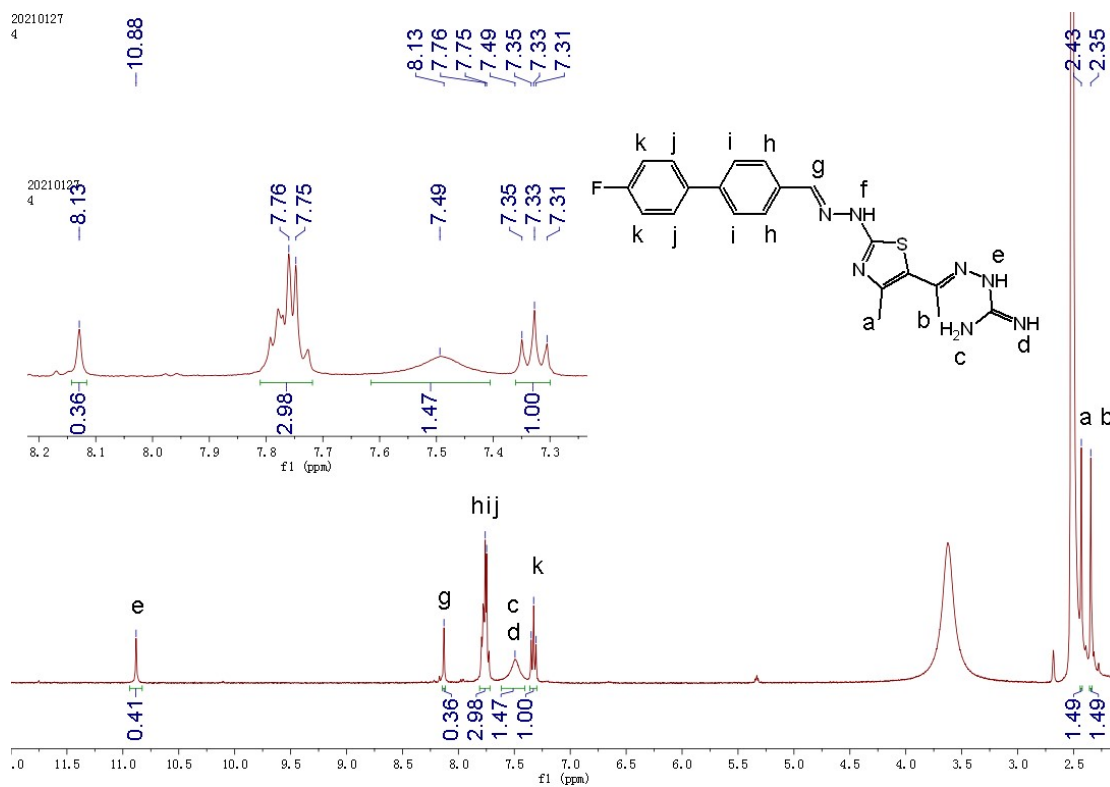

Figure S12.  $^1\text{H}$  NMR spectra of compound 4l.

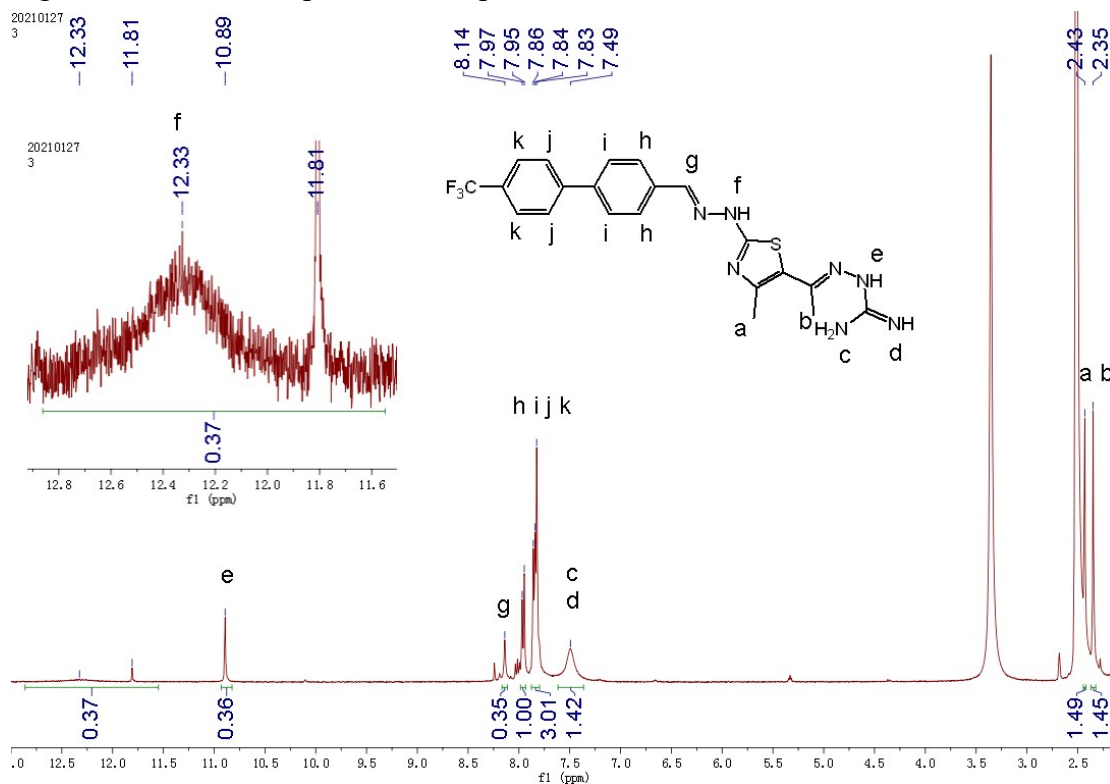

Figure S13.  $^1\text{H}$  NMR spectra of compound 4m.

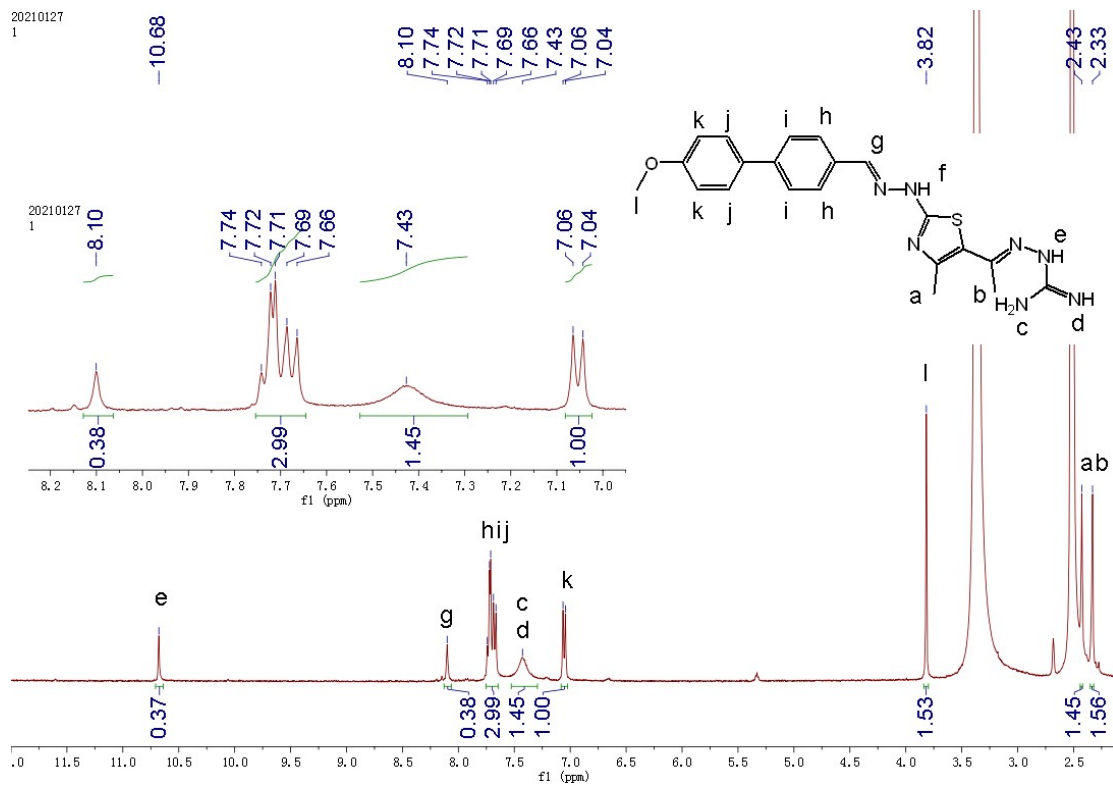

Figure S14.  $^1\text{H}$  NMR spectra of compound **4n**.

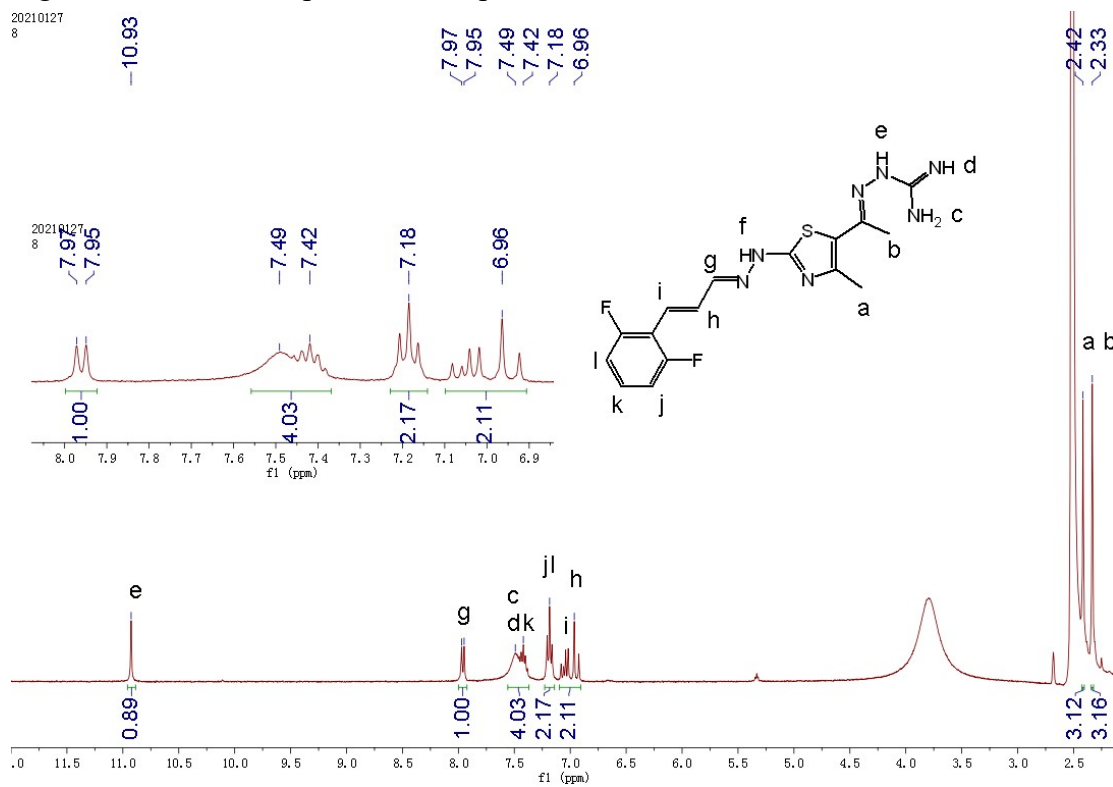

Figure S15.  $^1\text{H}$  NMR spectra of compound **4o**.



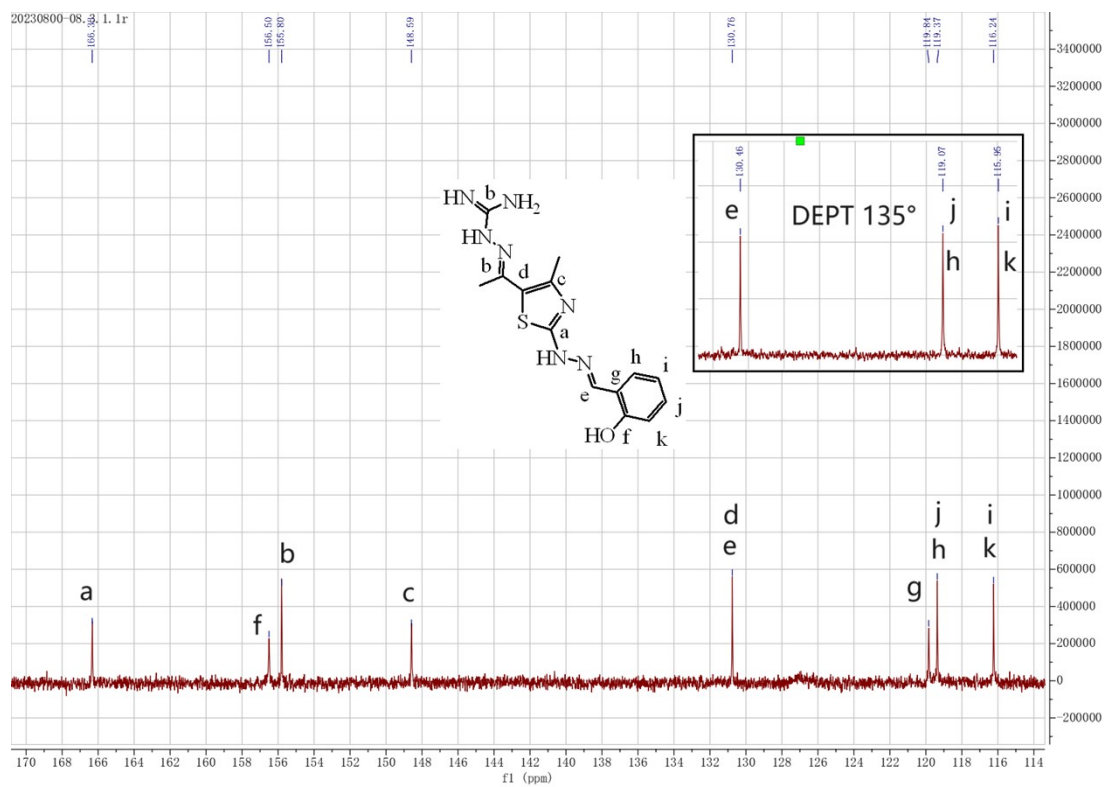

Figure S16.  $^{13}\text{C}$  NMR spectra of compound 4a.

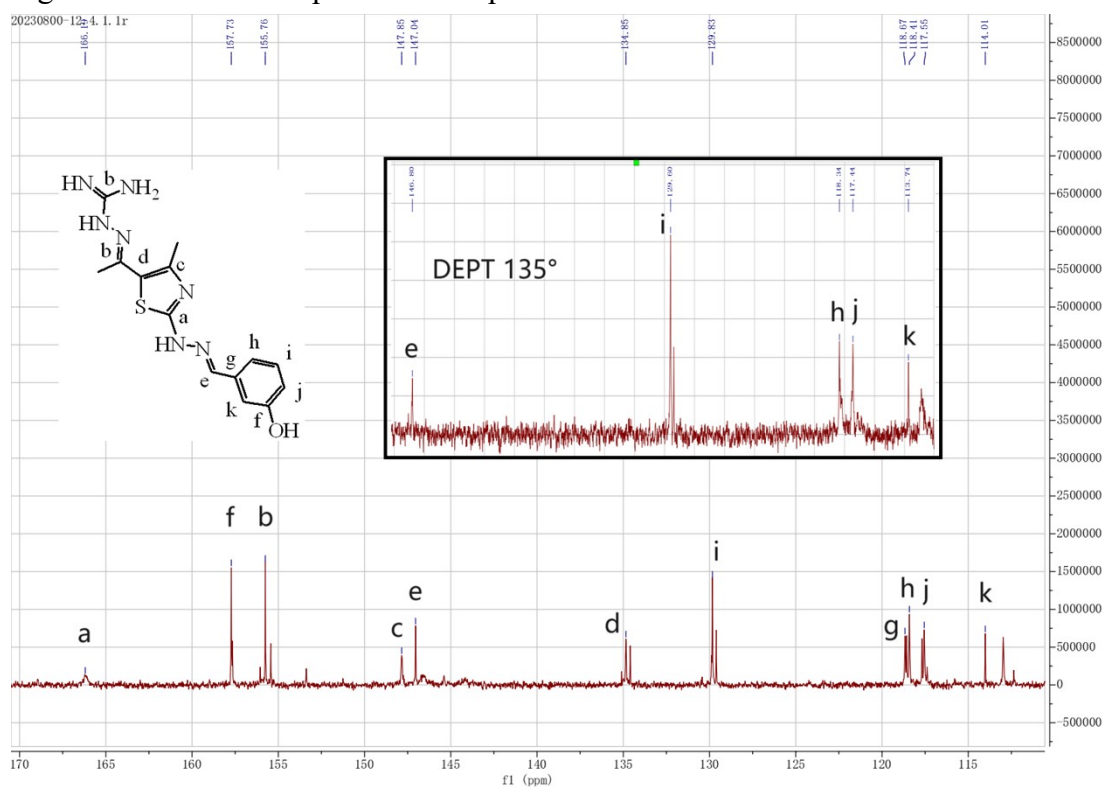

Figure S17.  $^{13}\text{C}$  NMR spectra of compound 4b.

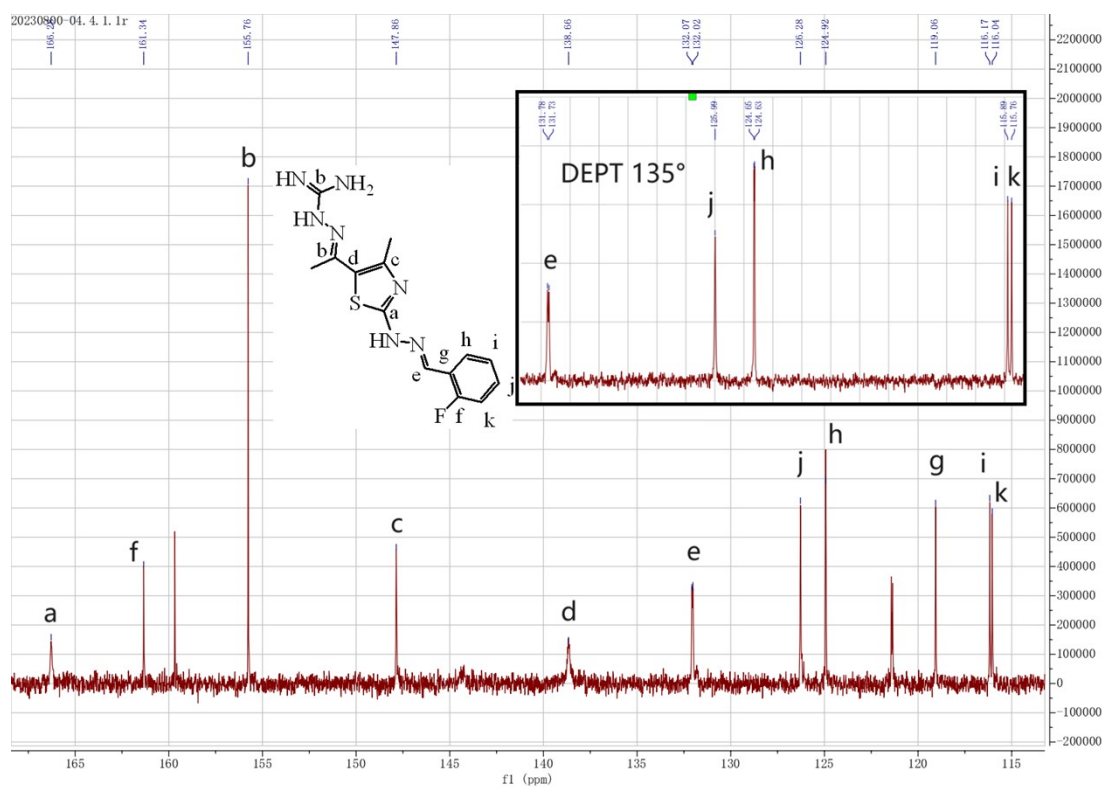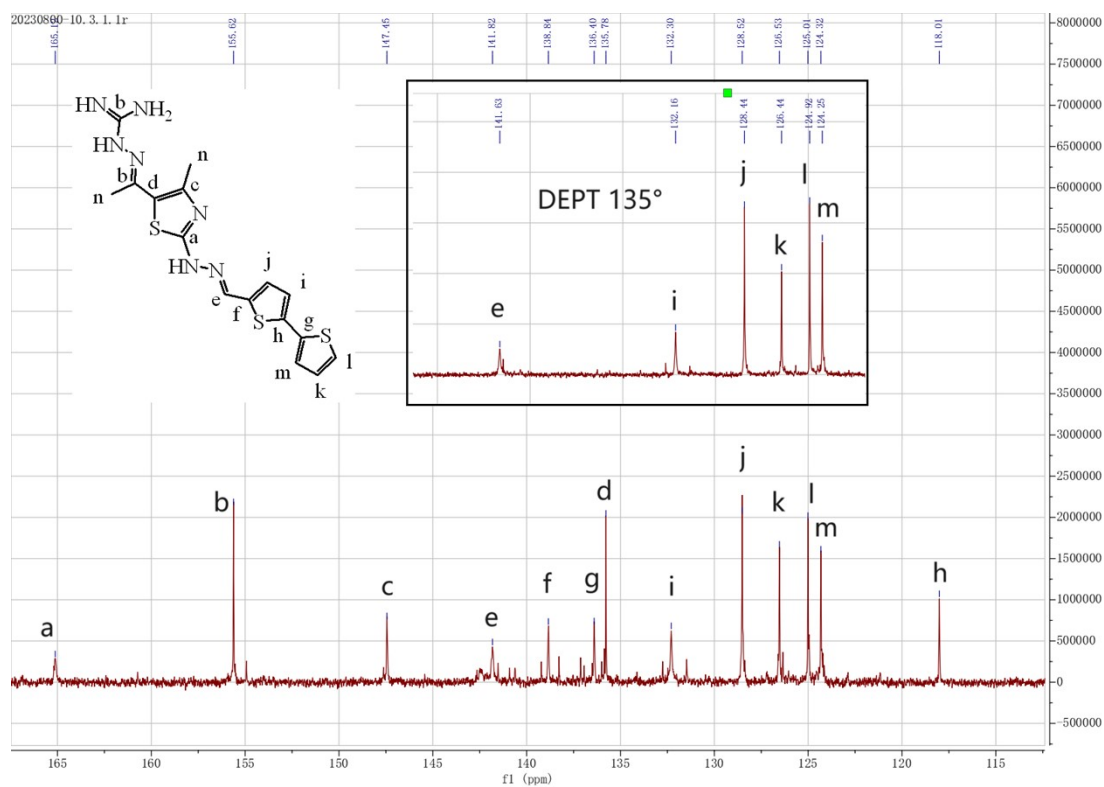

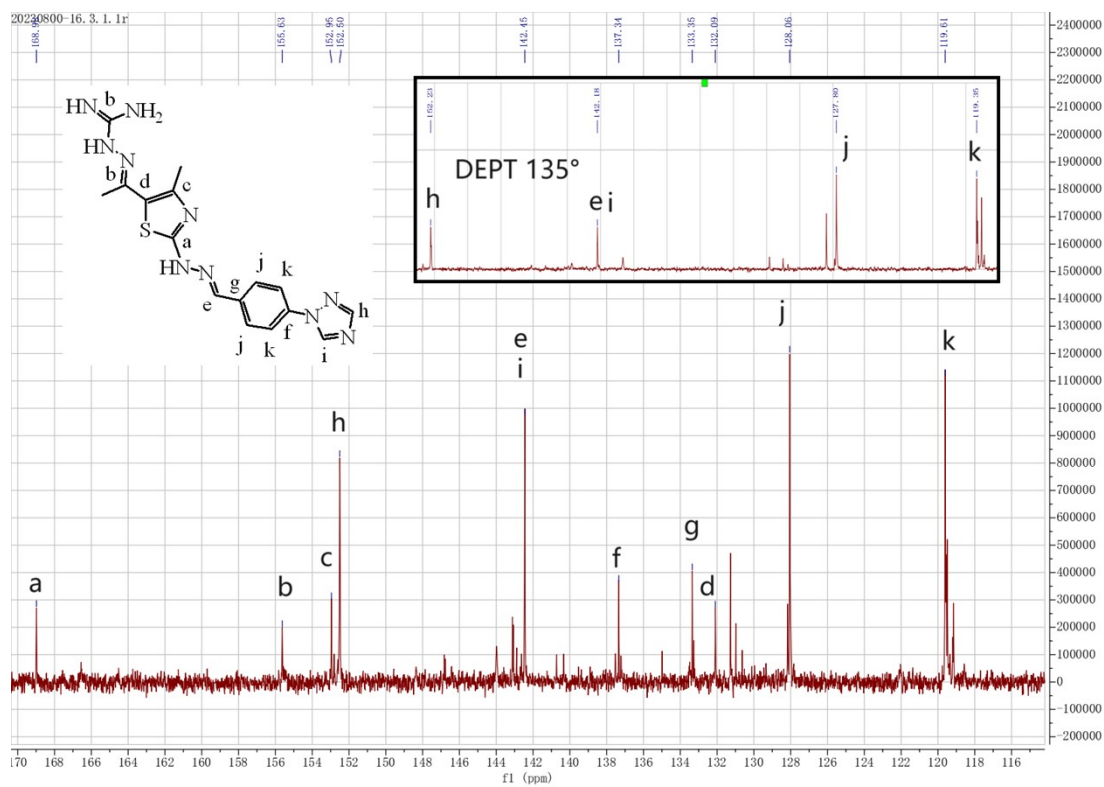

Figure S20.  $^{13}\text{C}$  NMR spectra of compound 4j.

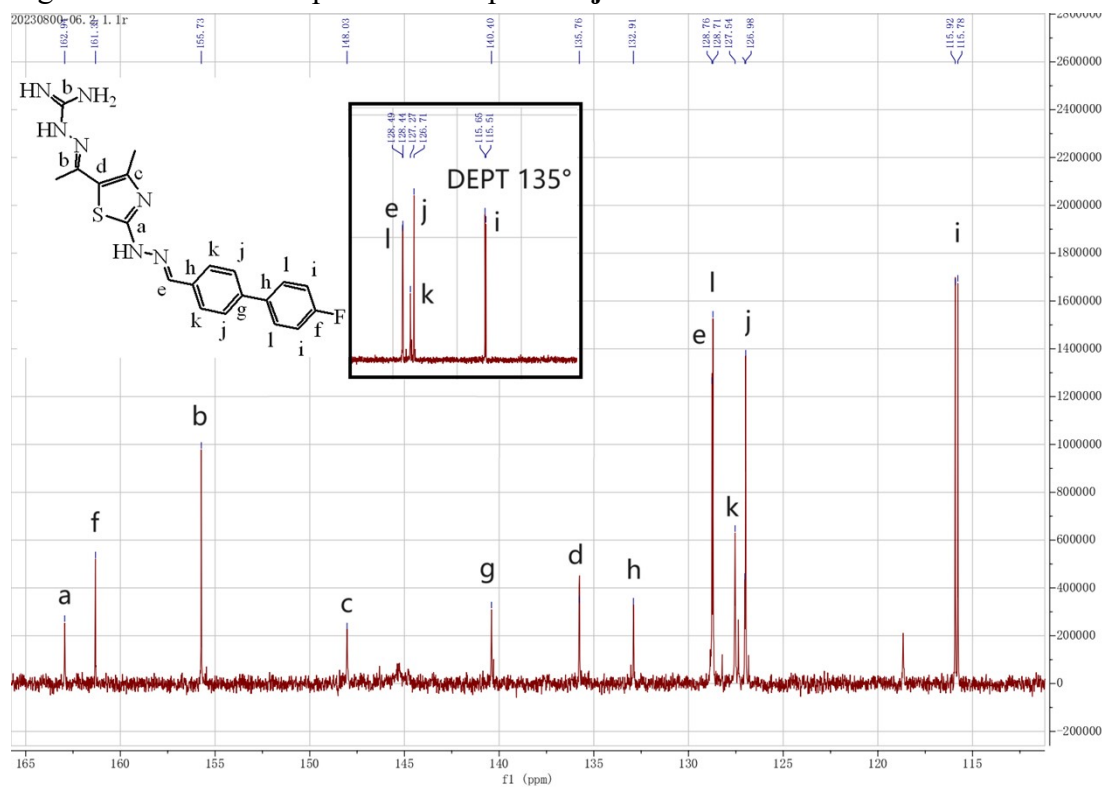

Figure S21.  $^{13}\text{C}$  NMR spectra of compound 4l.

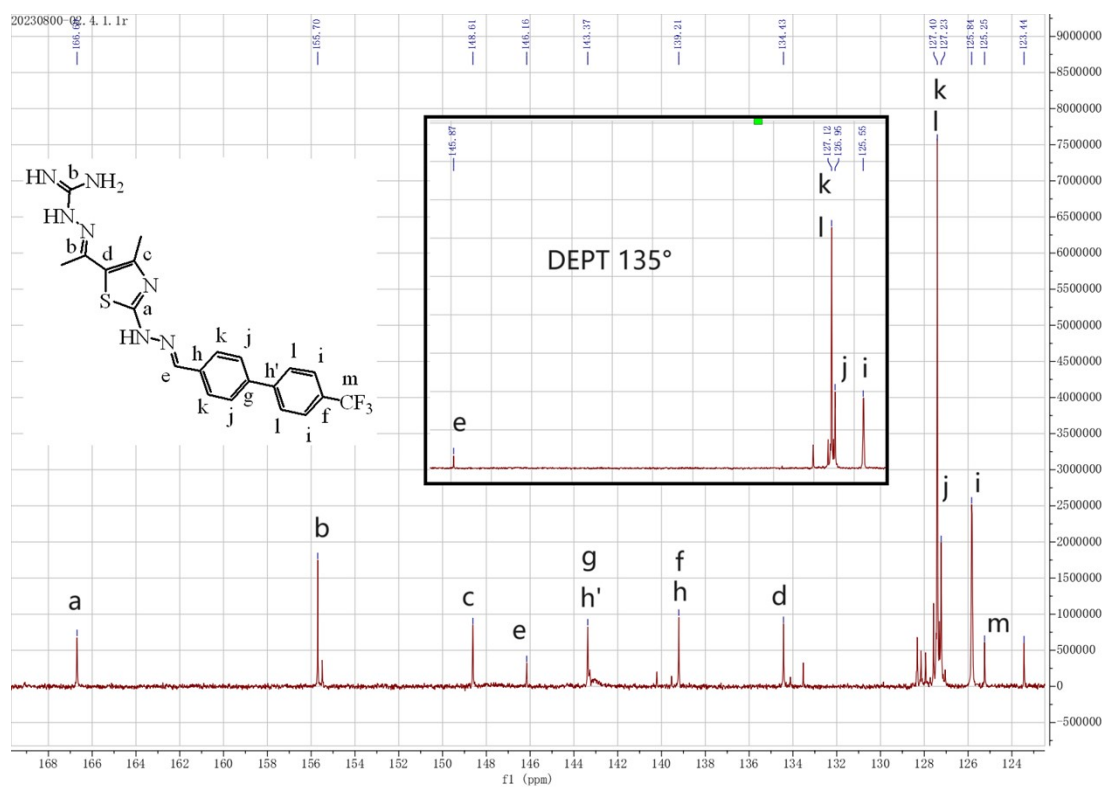

Figure S22.  $^{13}\text{C}$  NMR spectra of compound 4m.

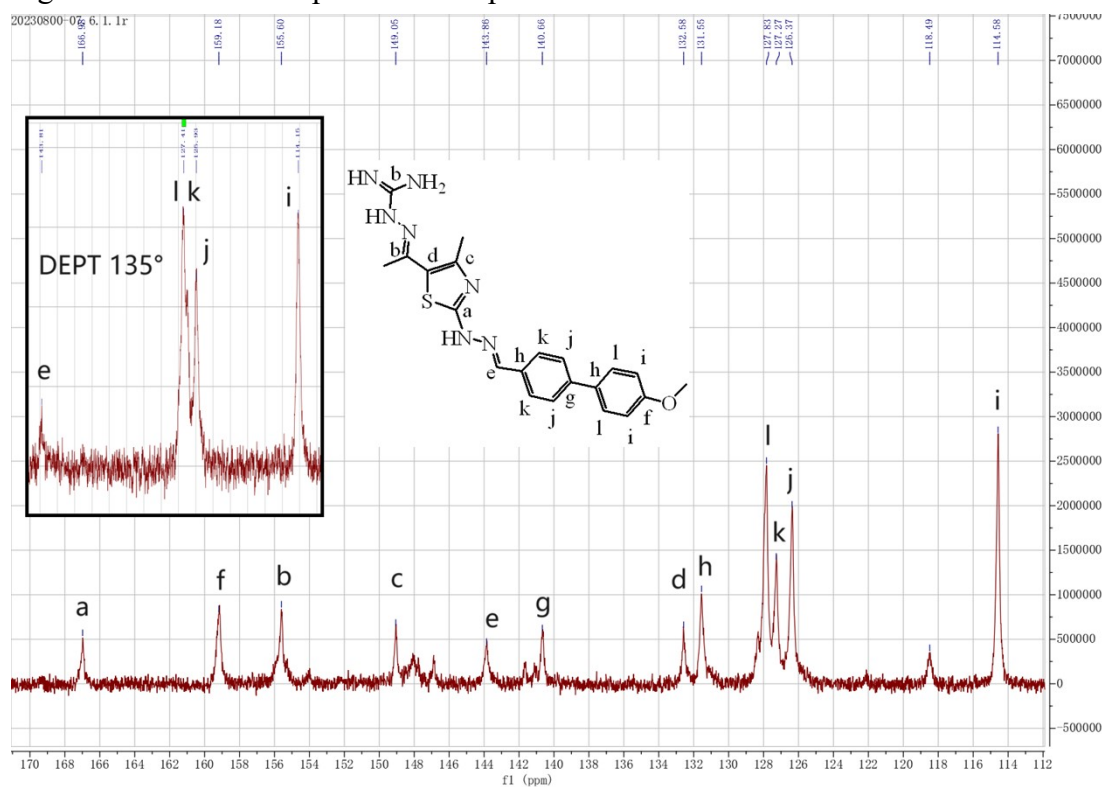

Figure S23.  $^{13}\text{C}$  NMR spectra of compound 4n.

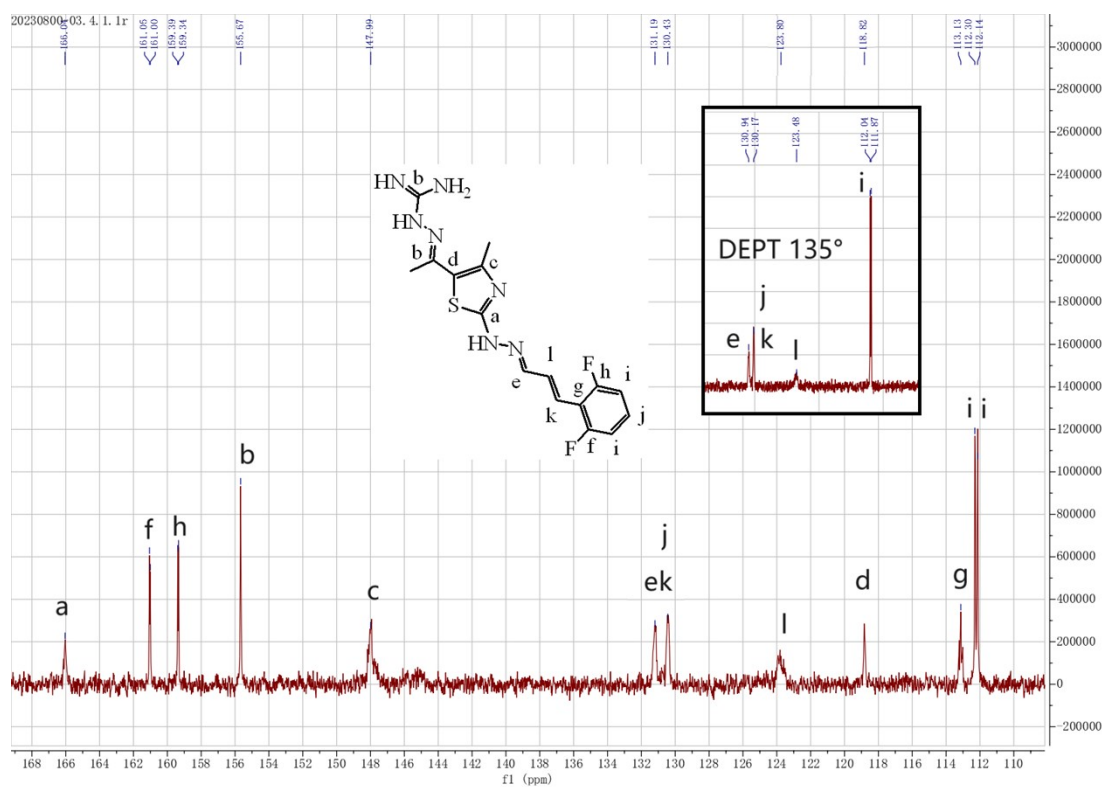

Figure S24.  $^{13}\text{C}$  NMR spectra of compound **4o**.

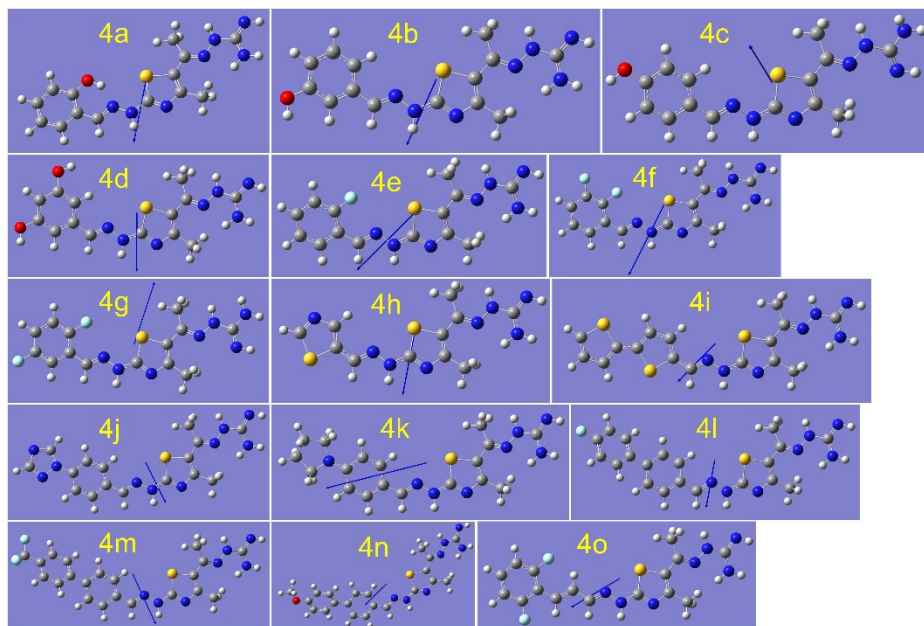

Figure S25. Computational conformation and dipole moment of compound **4a-o** (B3LYP/6-31g).

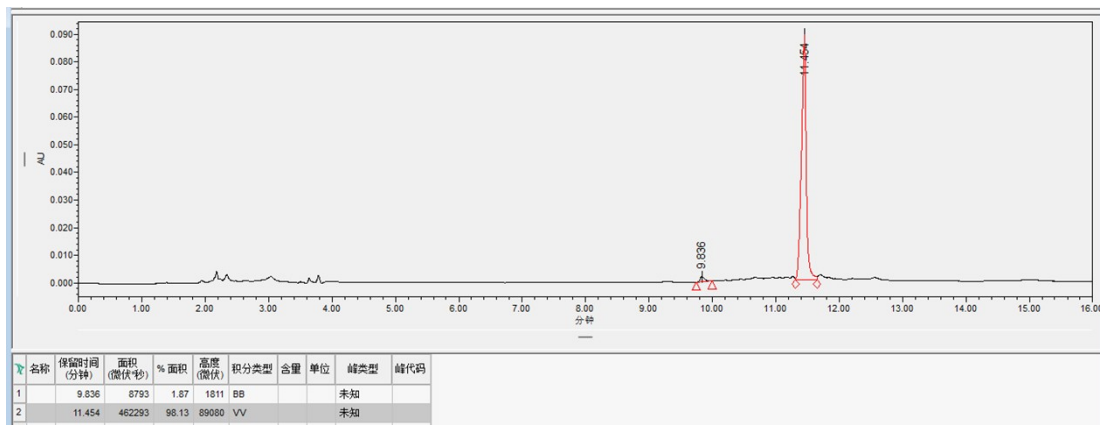

Figure S26. HPLC Traces, HPLC report of **4b**.

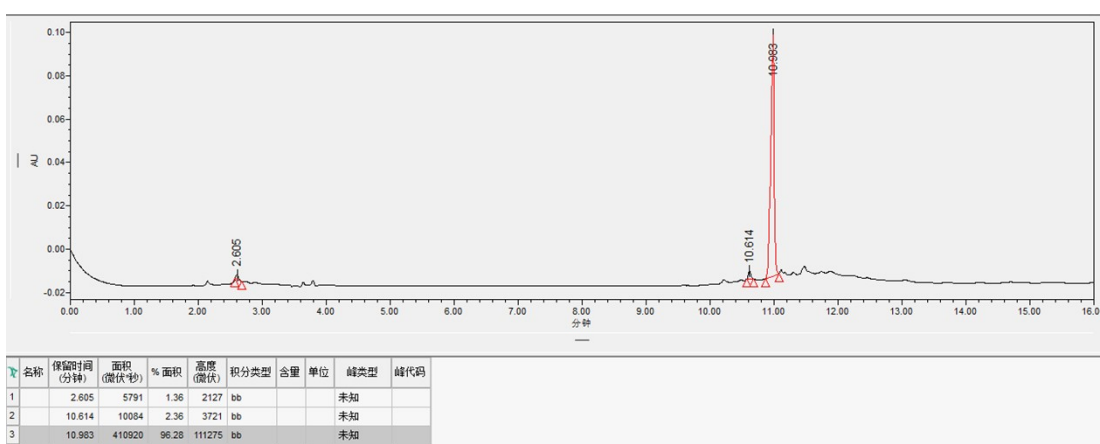

Figure S27. HPLC Traces, HPLC report of **4d**.

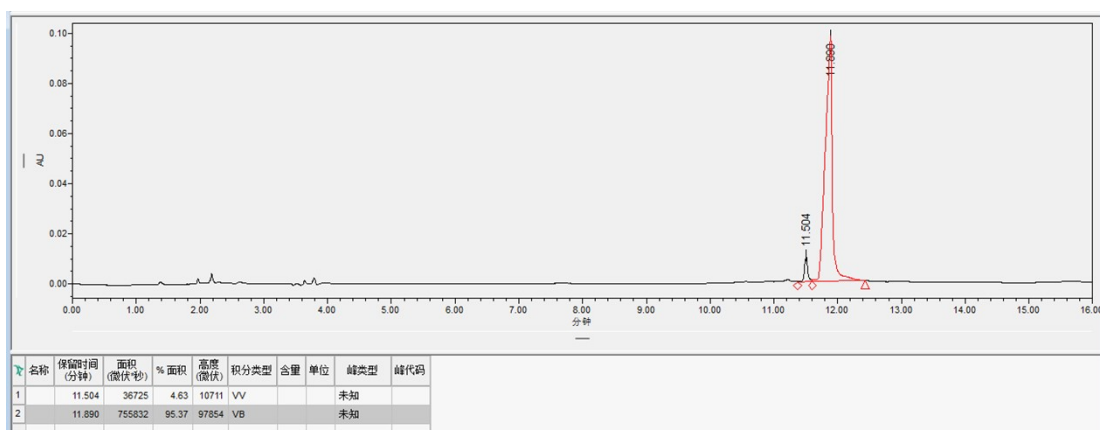

Figure S28. HPLC Traces, HPLC report of **4i**.

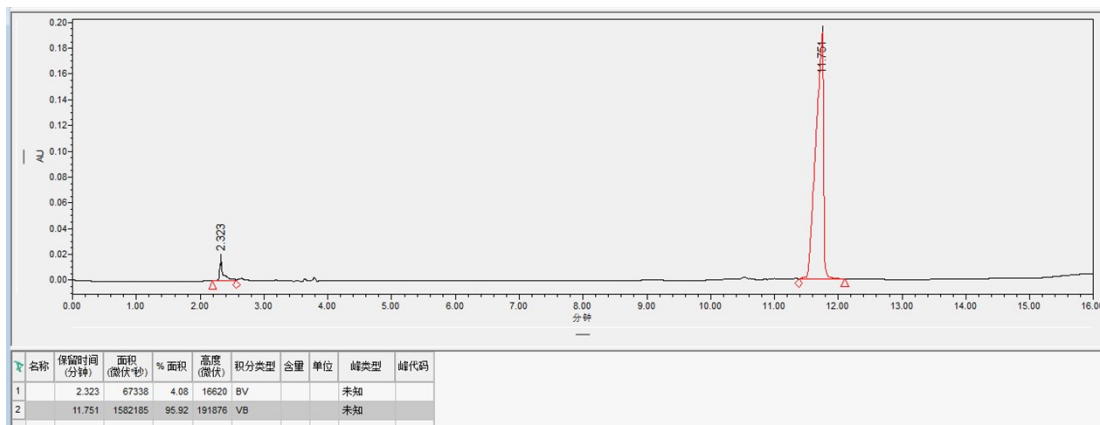

Figure S29. HPLC Traces, HPLC report of **4k**.

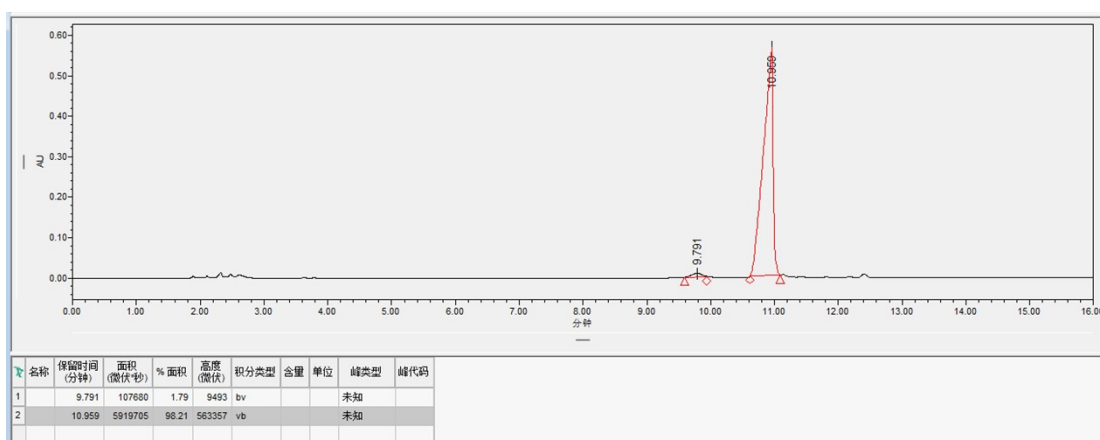

Figure S30. HPLC Traces, HPLC report of **4o**.

Table S1. Docking scores of compounds **4a–o** with UPPS (PDB code: 4h8e).

| Compound Number | Score (kcal/mol) |
|-----------------|------------------|
| <b>4a</b>       | -9.3             |
| <b>4b</b>       | -9.2             |
| <b>4c</b>       | -9.2             |
| <b>4d</b>       | -8.8             |
| <b>4e</b>       | -9.8             |
| <b>4f</b>       | -10.0            |
| <b>4g</b>       | -9.7             |
| <b>4h</b>       | -8.5             |
| <b>4i</b>       | -10.4            |
| <b>4j</b>       | -10.0            |
| <b>4k</b>       | -10.2            |
| <b>4l</b>       | -11.8            |
| <b>4m</b>       | -11.8            |
| <b>4n</b>       | -11.3            |
| <b>4o</b>       | -10.1            |



Table S2. In silico ADMET profiling of compounds **4a-o**.

| Compo<br>und | Absorption |                | Distribution |       | Metabolism          |                      | Excretion <sup>a</sup> |                            | Toxicity                   |                     |
|--------------|------------|----------------|--------------|-------|---------------------|----------------------|------------------------|----------------------------|----------------------------|---------------------|
|              | HIA        | H<br>O<br>B    | B<br>B<br>B  | PPB   | CYP2C9<br>substrate | CYP2C9<br>inhibition | CL<br>(mL/min/<br>kg)  | T <sub>1/2</sub><br>(hour) | Carcinogeni<br>ty (binary) | Ames<br>mutagenesis |
| <b>4a</b>    | +          | +              | +            | 0.674 | +                   | +                    | 2.706 <sup>b</sup>     | 0.607                      | –                          | + <sup>b</sup>      |
| <b>4b</b>    | +          | – <sup>b</sup> | +            | 0.633 | +                   | +                    | 2.410 <sup>b</sup>     | 0.613                      | –                          | + <sup>b</sup>      |
| <b>4c</b>    | +          | – <sup>b</sup> | +            | 0.612 | +                   | +                    | 2.550 <sup>b</sup>     | 0.677                      | –                          | + <sup>b</sup>      |
| <b>4d</b>    | +          | – <sup>b</sup> | +            | 0.631 | +                   | –                    | 2.283 <sup>b</sup>     | 0.747                      | –                          | + <sup>b</sup>      |
| <b>4e</b>    | +          | +              | +            | 0.633 | +                   | –                    | 2.582 <sup>b</sup>     | 0.229                      | –                          | + <sup>b</sup>      |
| <b>4f</b>    | +          | +              | +            | 0.608 | +                   | –                    | 2.593 <sup>b</sup>     | 0.153                      | –                          | + <sup>b</sup>      |
| <b>4g</b>    | +          | +              | +            | 0.656 | +                   | –                    | 2.610 <sup>b</sup>     | 0.112                      | –                          | + <sup>b</sup>      |
| <b>4h</b>    | +          | +              | –            | 0.483 | +                   | –                    | 2.263 <sup>b</sup>     | 0.525                      | –                          | + <sup>b</sup>      |
| <b>4i</b>    | +          | +              | –            | 0.836 | +                   | –                    | 2.608 <sup>b</sup>     | 0.015                      | –                          | + <sup>b</sup>      |
| <b>4j</b>    | +          | +              | –            | 0.585 | –                   | +                    | 2.567 <sup>b</sup>     | 0.575                      | –                          | + <sup>b</sup>      |
| <b>4k</b>    | +          | +              | +            | 0.723 | –                   | –                    | 2.264 <sup>b</sup>     | 0.184                      | –                          | + <sup>b</sup>      |
| <b>4l</b>    | +          | +              | +            | 0.789 | +                   | +                    | 2.959 <sup>b</sup>     | 0.064                      | –                          | + <sup>b</sup>      |
| <b>4m</b>    | +          | +              | +            | 0.903 | +                   | +                    | 3.144 <sup>b</sup>     | 0.034                      | –                          | + <sup>b</sup>      |
| <b>4n</b>    | +          | +              | +            | 0.873 | +                   | +                    | 2.935 <sup>b</sup>     | 0.123                      | –                          | + <sup>b</sup>      |
| <b>4o</b>    | +          | +              | +            | 0.663 | +                   | –                    | 2.869 <sup>b</sup>     | 0.215                      | –                          | + <sup>b</sup>      |

Note: HIA, human intestinal absorption. HOB, human oral bioavailability. BBB, blood brain barrier penetration. PPB, plasma protein binding. CL, clearance. T<sub>1/2</sub>, half-life time. The data in the table are calculated using admetSAR from <http://lmm.d.ecust.edu.cn/admetSar2>. <sup>a</sup>, the data are calculated using ADMETlab 2.0 from <https://admetmesh.scbdd.com>. <sup>b</sup>, it means poor.
